# Supplementary material for: A modified Delphi exercise in physician-perceived risk factors for drug-induced pneumotoxicity in patients with rheumatological disease
Source: PubMed Central journal article supplement (PMC11529426; doi:10.1186/s12890-024-03287-0), 2024-10-31
Supplement: 12890_2024_3287_MOESM1_ESM.pdf [file 12890_2024_3287_MOESM1_ESM.pdf]

# Pnemototoxicity Associated With Rheumatological Drugs (PASSWRD) Tier 1

An e-Delphi exercise to reach consensus on risk of drug-induced pneumotoxicity in patients with rheumatological disease

## Section 1

Tier 1

About you. All responses are anonymous.

1. Please enter the email address that this invitation was sent to: (for subsequent engagements if you would prefer to use a different email please contact

[loth.delphipneumotoxicity@nhslothian.scot.nhs.uk](mailto:loth.delphipneumotoxicity@nhslothian.scot.nhs.uk))

Enter your answer

2. What is your primary specialty?

Rheumatology

Pulmonology

3. Years of experience in your specialty (in years)

1-4

5-9

10-20

> 20

4. How confident do you feel about assessing risk of pneumotoxicity in adults with DMARDS/Biologics and underlying rheumatological conditions?

1= no confidence.

7= extremely confident.

1

2

3

4

5

6

7

5. PATIENT FACTOR DOMAINS

We would like to compile a list of relevant patient factors for Tier 2 of this Delphi exercise.

Which of the following patient factors do you consider when assessing risk of developing pneumotoxicity?

Age

Yes

No

Don't know

6. Gender

Yes

No

Don't know

**7. Ethnicity**

Yes  No  Don't know

**8. Smoking**

Yes  No  Don't know

**9. BMI**

Yes  No  Don't know

**10. Underlying rheumatological diagnosis**

Yes  No  Don't know

**11. Activity of underlying rheumatic disease**

Yes  No  Don't know

**12. If answered "no" or "I don't know" to Q11, please go to Q13. If answered "yes" please specify which measure of activity you consider when assessing risk of pneumotoxicity (tick all that apply)**

Disease activity score (e.g. DAS28, BASDAI, PsARC, SLEDAI or other)

Imaging score (MRI, US etc)  ESR  CRP  Ferritin

Complement  Autoimmune serological titre (RhF, CCP, Jo-1 etc)  Serum ACE

**13. Pre-existing interstitial lung disease (ILD)**

Yes  No  Don't know

**14. If you responded "no" or "I don't know" to Q13, please go to Q20. If you responded "yes", please indicate which features on HRCT you consider when assessing risk of pneumotoxicity**

**Pattern of disease (for example UIP, NSIP, etc.)**

Yes  No  Don't know

**15. Presence of fibrosis (honeycombing, traction bronchiectasis)**

Yes  No  Don't know

**16. Presence of 'inflammation' (ground glass or air-space opacification)**

Yes  No  Don't know

**17. Presence of lung nodules**

Yes  No  Don't know

**18. Volume of lung affected by ILD on HRCT**

Yes  No  Don't know

**19. Progression of ILD between serial HRCT scans**

Yes  No  Don't know

**20. COPD and/or emphysema**

Yes  No  Don't know

**21. Asthma**

Yes  No  Don't know

**22. Bronchiectasis**

Yes  No  Don't know

**23. Other respiratory co-morbidities - please specify**

Enter your answer

**24. Static Lung function measurements (spirometry, gas transfer)**

Yes  No  Don't know

**25. If you responded "no" or "don't know" to Q24, please go to Q30. If you responded "yes", please indicate which features on static lung function would you consider when assessing risk of pneumotoxicity**

**FEV1**

Yes  No  Don't know

**26. FVC**

Yes  No  Don't know

**27. FEV1/FVC ratio**

Yes  No  Don't know

**28. TLCO**

Yes  No  Don't know

**29. KCO (=TLCO corrected for alveolar volume)**

Yes  No  Don't know

**30. Change in static lung function between historical serial measurements (if available)**

Yes  No  Don't know

**31. If answered "no" or "don't know" to Q30, please go to Q35. If answered "yes", please indicate which features of serial static lung function measurement (if available) do you consider when assessing risk of pneumotoxicity.**

**Change in FEV1**

Yes  No  Don't know

**32. Change in FVC**

Yes  No  Don't know

**33. Change in TLCO**

Yes  No  Don't know

**34. Change in KCO**

Yes  No  I don't know

**35. Desaturation on formal exercise testing (e.g. 6MWT, shuttle etc)**

Yes  No  Don't know

**36. Walking distance on formal exercise testing (e.g. 6MWT, shuttle etc)**

Yes  No  Don't know

**37. Please indicate which non-respiratory co-morbidities you consider when assessing the risk of pneumotoxicity (tick all that apply)**

Cardiac  Liver  GI tract  Renal   
Neurological  Diabetes mellitus  Metabolic/endocrine   
Haematological  Psychiatric  None of the above

**38. DRUG FACTOR DOMAINS**

**We would like to compile a list of relevant rheumatological drugs for Tier 2 of this Delphi exercise.**

**Please identify which drugs you consider to be significantly associated with pneumotoxicity. Consider 'significantly' to be such that you would actively counsel the patient that there is a risk of pneumotoxicity.**

**Conventional DMARDs (tick all that apply)**

Azathioprine  Methotrexate  Leflunomide  Sulfasalazine   
Hydroxychloroquine  MMF  None of the above

**39. Anti-TNF (tick all that apply)**

Adalimumab  Certolizumab  Etanercept   
Golimumab  Infliximab  None of the above

**40. Do you consider that individual drugs within the anti-TNF class have different risks of pneumotoxicity?**

Yes  No  Don't know

**41. Anti-IL1 (tick all that apply)**

Anakinra  Canakinumab  None of the above

**42. Do you consider that individual drugs within the anti-IL1 class have different risks of pneumotoxicity?**

Yes  No  Don't know

**43. Anti-IL6, (tick all that apply)**

Sarilumab  Tocilizumab  None of the above

**44. Do you consider that individual drugs within the anti-IL6 class have different risks of pneumotoxicity?**

Yes  No  Don't know or not applicable

**45. Anti IL12/23**

Ustekinumab  None of the above

**46. Do you consider that individual drugs within the anti-IL12/23 class have different risks of pneumotoxicity?**

Yes  No  Don't know or not applicable

**47. Anti-IL17 (tick all that apply)**

Ixekizumab  Secukinumab  None of the above

**48. Do you consider that individual drugs within the anti-IL17 class have different risks of pneumotoxicity?**

Yes  No  Don't know or not applicable

**49. JAK-STAT inhibitors (tick all that apply)**

Baricitinib  Tofacitinib  Upadacitinib

Filgotinib  None of the above

**50. Do you consider that individual drugs within the JAK-STAT inhibitor class have different risks of pneumotoxicity?**

Yes  No  Don't know or not applicable

**51. T-cell modulator**

Abatacept  None of the above

**52. B-cell depleter or modulator (tick all that apply)**

Belimumab  Rituximab  None of the above

**53. Do you consider that individual drugs within the B-cell deplete/modulator class have different risks of pneumotoxicity?**

Yes

No

Don't know or not applicable

**54. Other drugs. In the free text box please indicate any other licensed drugs that you currently use in CTD and you associate with pneumotoxicity**
